# Supplementary material for: Genome-wide association study of 1,5-anhydroglucitol identifies novel genetic loci linked to glucose metabolism
Source: PubMed Central journal article supplement (PMC5460207; doi:10.1038/s41598-017-02287-x), 2017-06-06
Supplement: 41598_2017_2287_MOESM1_ESM.pdf [file 41598_2017_2287_MOESM1_ESM.pdf]

# Genome-wide association study of 1,5-anhydroglucitol identifies novel genetic loci linked to glucose metabolism

## Supplementary Materials

Man Li<sup>1,2</sup>, Nisa M. Maruthur<sup>1,3,4</sup>, Stephanie Loomis<sup>1</sup>, Maik Pietzner<sup>11, 12</sup>, Kari E. North<sup>5</sup>, Hao Mei<sup>6</sup>, Alanna C. Morrison<sup>7</sup>, Nele Friedrich<sup>11, 12</sup>, James S. Pankow<sup>8</sup>, Matthias Nauck<sup>11, 12</sup>, Eric Boerwinkle<sup>7,9</sup>, Alexander Teumer<sup>12,13</sup>, Elizabeth Selvin<sup>1,3,4</sup>, Anna Köttgen\*<sup>1,10</sup>

<sup>1</sup> Department of Epidemiology, Johns Hopkins Bloomberg School of Public Health, Baltimore, Maryland

<sup>2</sup> Division of Nephrology, Department of Internal Medicine, University of Utah School of Medicine, Salt Lake City, Utah

<sup>3</sup> Department of Medicine, Division of General Internal Medicine, The Johns Hopkins University School of Medicine, Baltimore, Maryland

<sup>4</sup> The Welch Center for Prevention, Epidemiology, and Clinical Research, The Johns Hopkins University, Baltimore, Maryland

<sup>5</sup> Department of Epidemiology, University of North Carolina, Chapel Hill, North Carolina

<sup>6</sup> Department of Data Science, School of Population Health, University of Mississippi Medical Center, Jackson, Mississippi

<sup>7</sup> Human Genetics Center, School of Public Health, University of Texas Health Science Center at Houston, Houston, Texas

<sup>8</sup> Division of Epidemiology and Community Health, School of Public Health, University of Minnesota, Minneapolis, Minnesota

<sup>9</sup> Human Genome Sequencing Center, Baylor College of Medicine, Houston, Texas

<sup>10</sup> Institute of Genetic Epidemiology, Faculty of Medicine and Medical Center – University of Freiburg, Freiburg, Germany

<sup>11</sup> Institute of Clinical Chemistry and Laboratory Medicine, University Medicine Greifswald, Germany

<sup>12</sup> DZHK (German Centre for Cardiovascular Research), partner site Greifswald, Greifswald, Germany

<sup>13</sup> Institute for Community Medicine, University Medicine Greifswald, Germany

### Corresponding Author:

Anna Köttgen, MD MPH

Division of Genetic Epidemiology

Medical Center – University of Freiburg, Faculty of Medicine

Hugstetter Str. 49, 79106 Freiburg, Germany

Johns Hopkins Bloomberg School of Public Health, Baltimore, MD

anna.koettgen@uniklinik-freiburg.de

**Figure S1. Quantile-Quantile plot of observed versus expected  $-\log_{10}(P)$  of the GWAS of 1,5-anhydroglucitol.** Shown are p-values for all single nucleotide variants with imputation quality  $>0.3$  and minor allele frequency  $\geq 0.01$ . Left panel: European ancestry participants ( $\lambda=1.02$ ); right panel: African American participants ( $\lambda=0.99$ ).

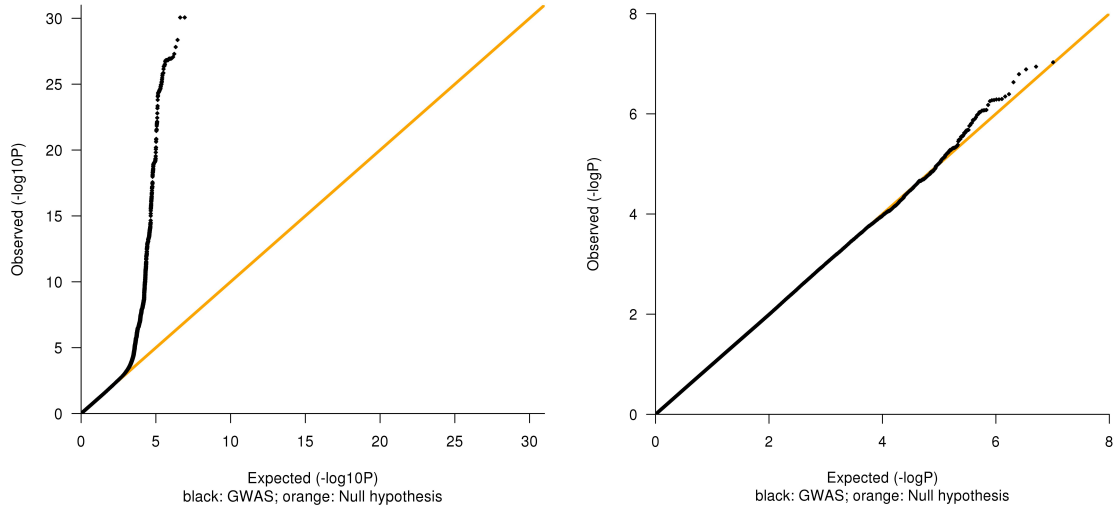

**Figure S2. Manhattan plot of the results of the GWAS of 1,5-anhydroglucitol in African American participants from the ARIC study.** The y-axis represents the  $-\log_{10}$ (association p-values) and the x-axis the genomic position (GRCh build37). The red dotted line indicates the genome-wide significance threshold ( $P < 5 \times 10^{-8}$ ), the blue dotted line the suggestive significance threshold ( $P < 1 \times 10^{-6}$ ).

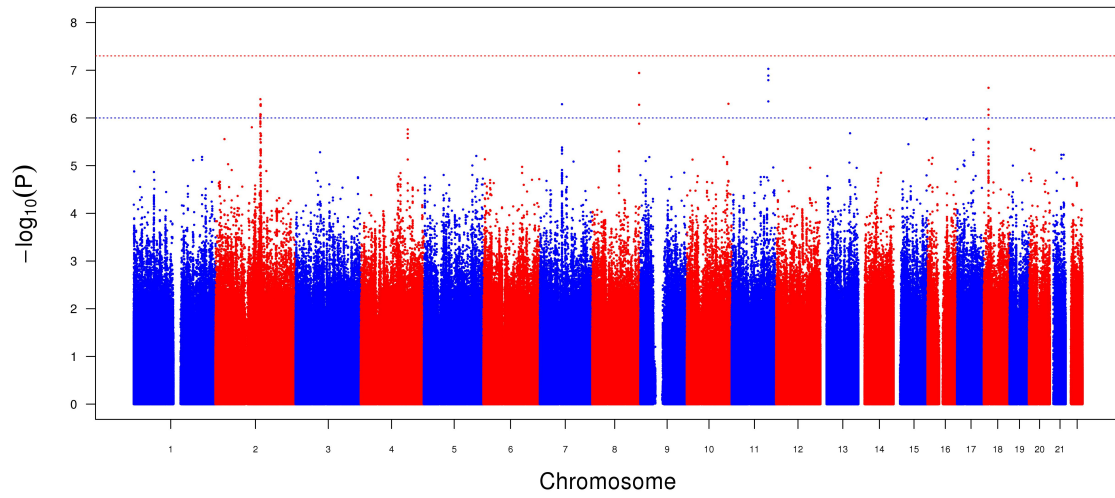

**Figure S3. Histograms of 1,5-AG concentration in European ancestry individuals (left) and African American individuals (right) in the ARIC study.**

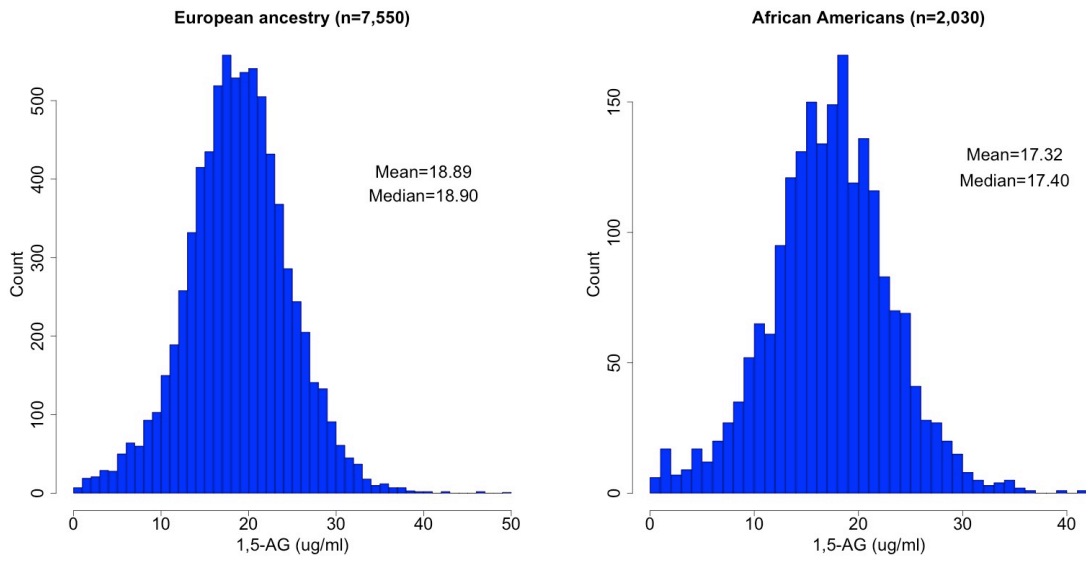

**Figure S4. Flow chart showing the overall study design.**

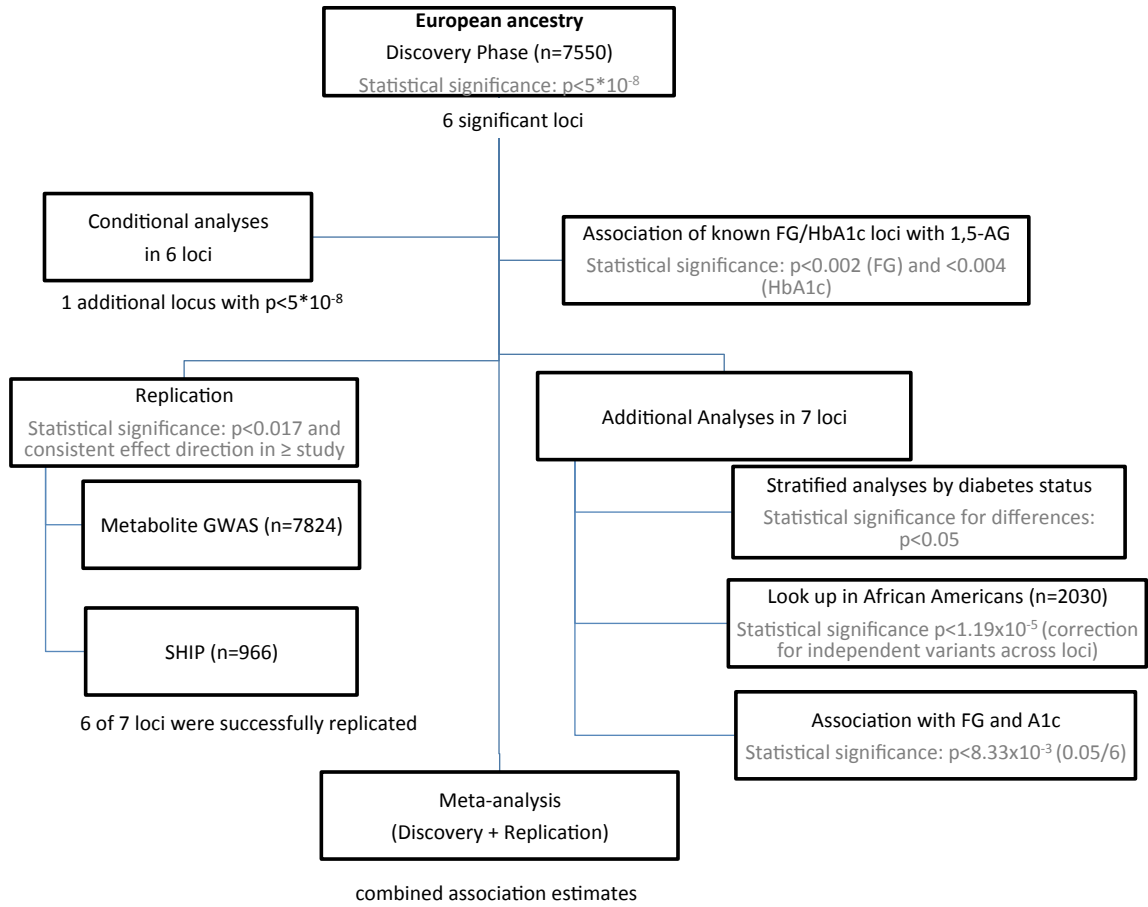

**Figure S5. Regional association plots of the 6 loci containing genome-wide significant association signals in EA participants.** Shown are the  $-\log_{10}(\text{association p-values})$  versus genomic position (on GRCh build37) in the GWAS analysis before (“unconditional” left panel: **A1-F1**) and after conditioning on the identified index variants (“conditional” right panels: **A2-F2**). The index variant is highlighted in purple.

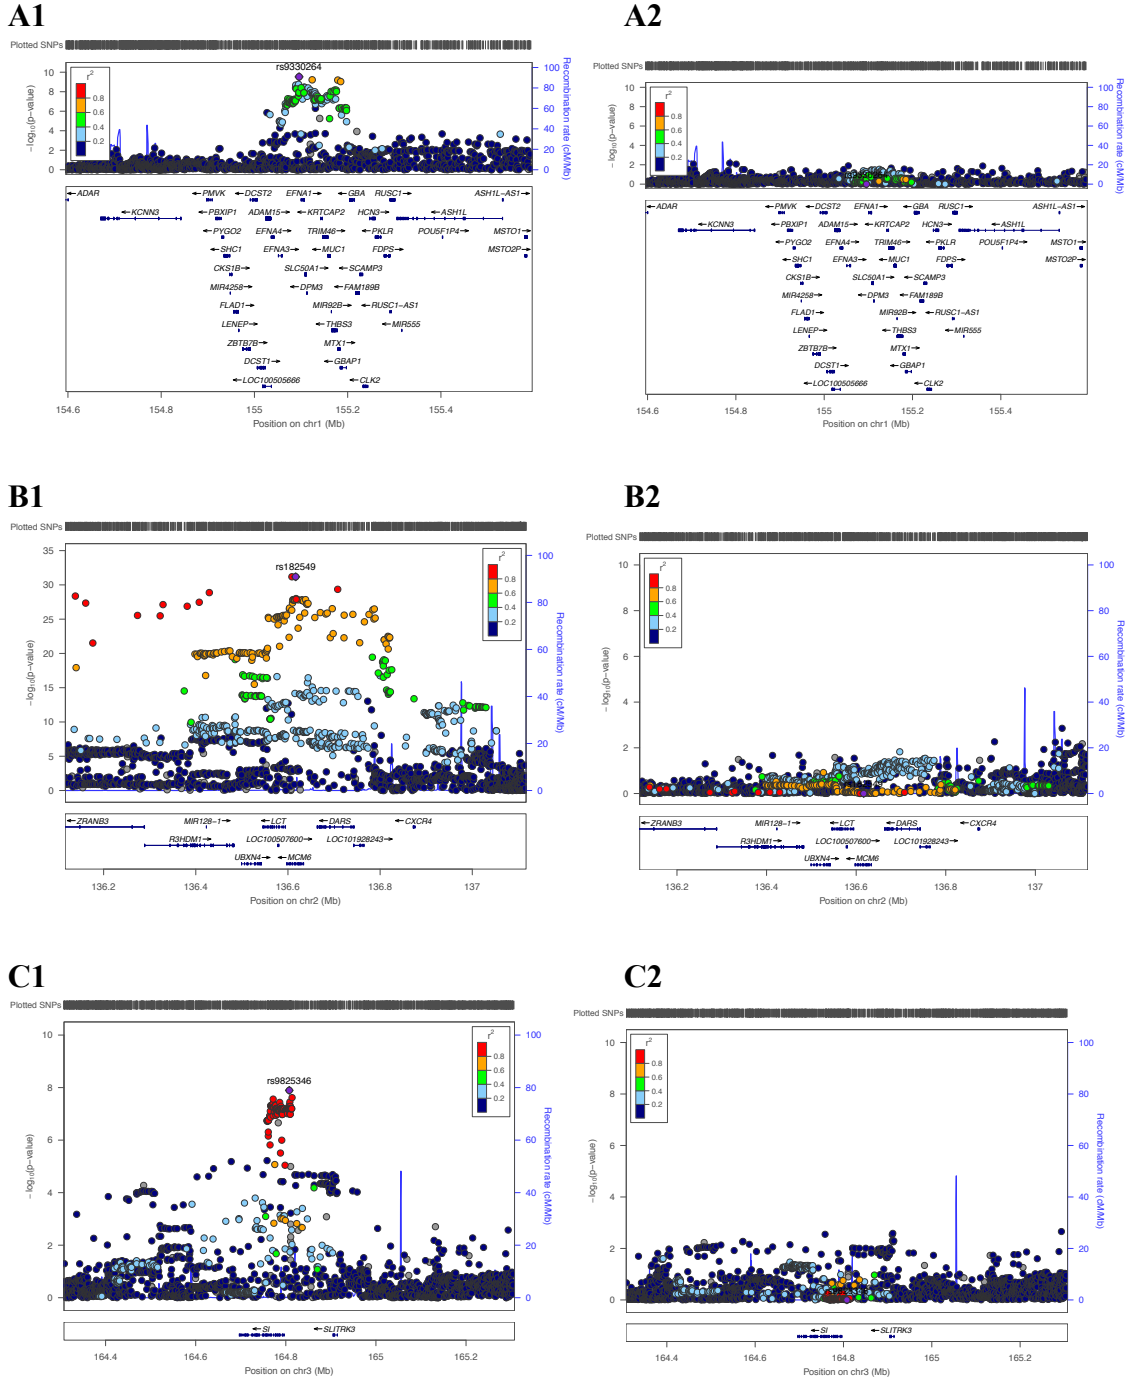

### D1

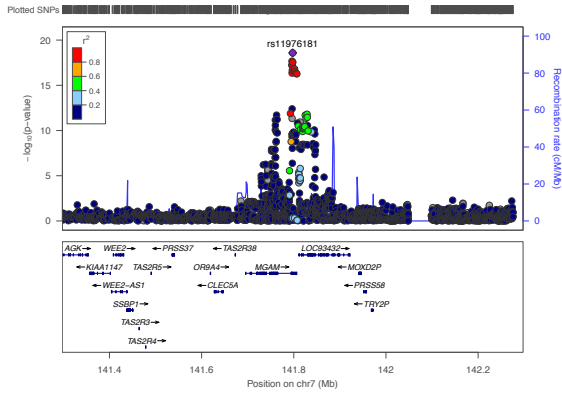

### D2

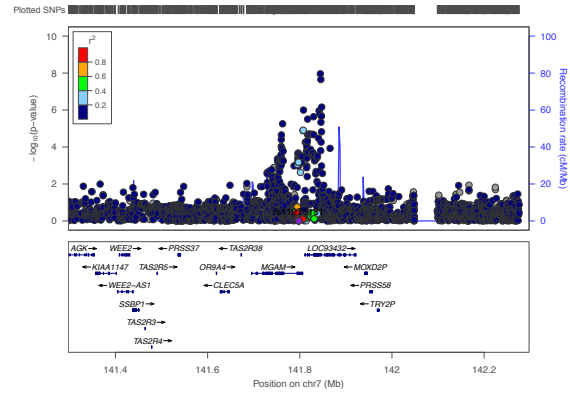

### E1

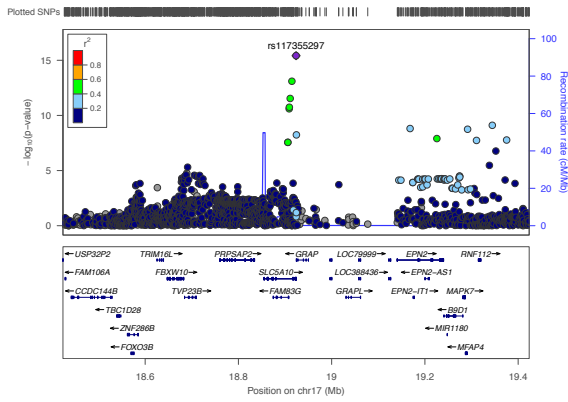

### E2

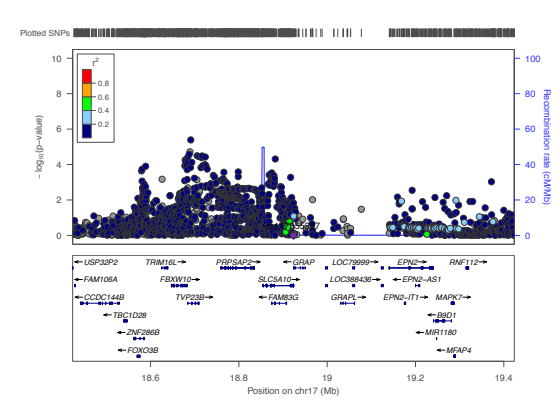

### F1

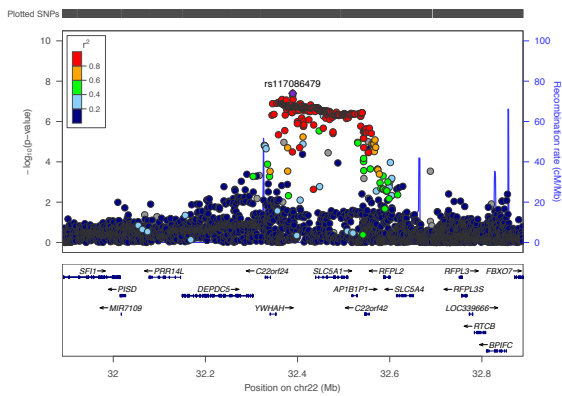

### F2

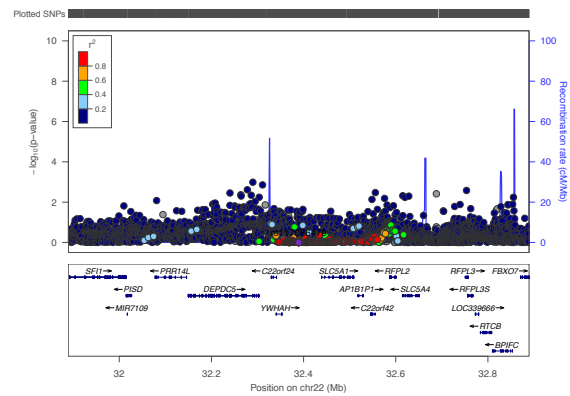

**Figure S6. Regional association plots of the 6 loci that reached genome-wide significance in the EA population in AA participants.** Only independent SNPs in the 500kb flanking region of the index SNP in EA were considered for association among AA participants. The  $r^2$  information was extracted from the 1000 Genomes Project Phase 3 in African (AFR) population. The annotated SNP is the variant identified among the EA population.

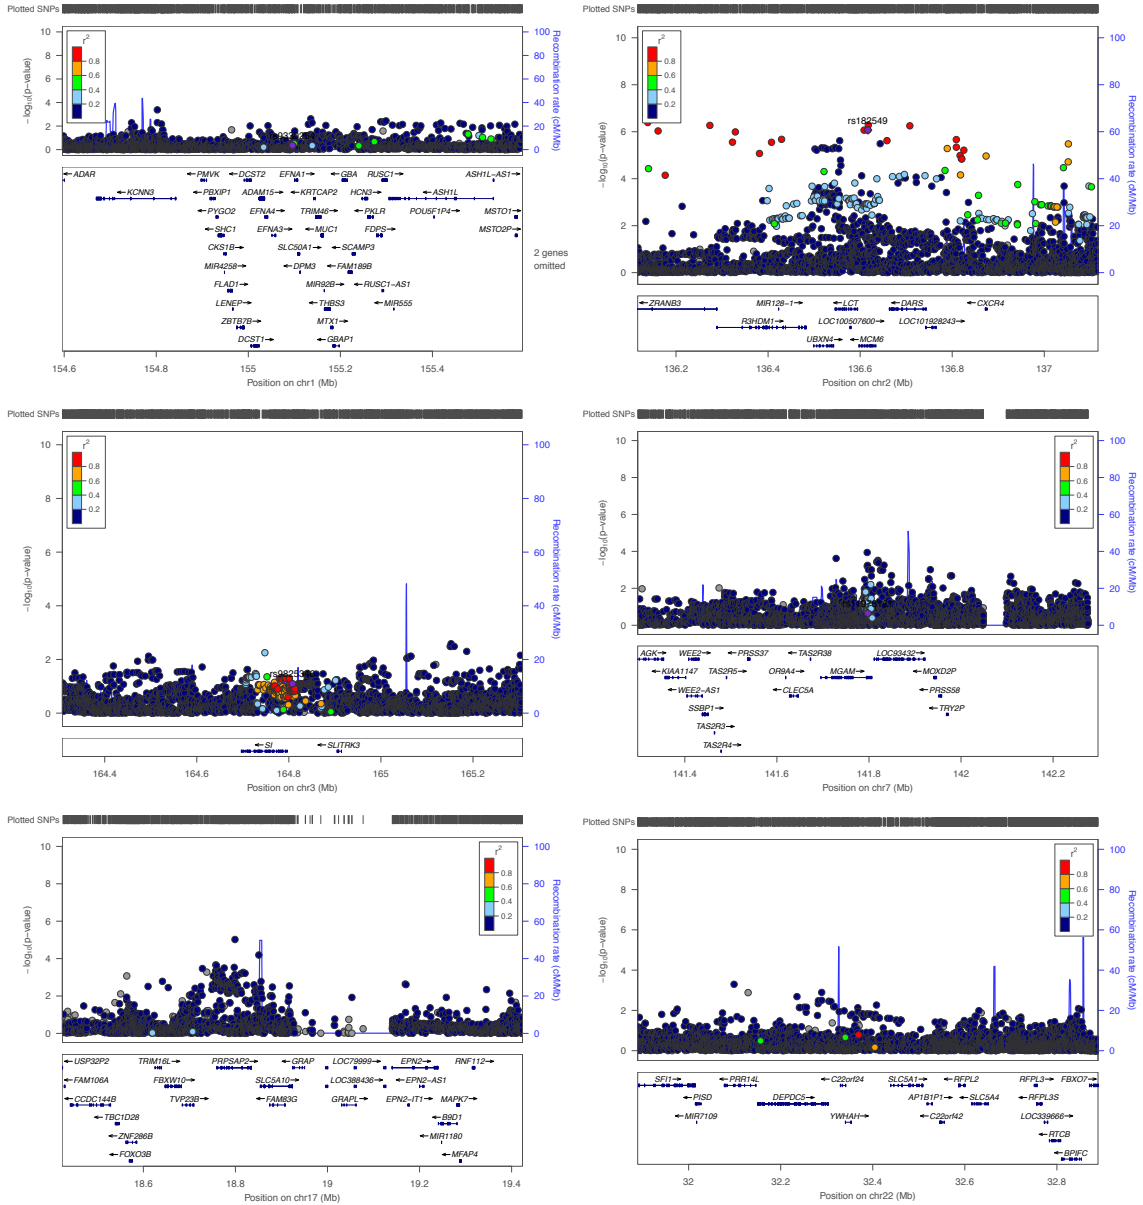



**Table S1. Annotation for novel loci identified in genome-wide association analysis for 1,5-AG in European ancestry participants in the ARIC study.** Annotation information was obtained from GeneCards.

| <b>Gene Name</b> | <b>Gene Description</b>                                                                                                                                                                                                                                                                                                                                                                                           |
|------------------|-------------------------------------------------------------------------------------------------------------------------------------------------------------------------------------------------------------------------------------------------------------------------------------------------------------------------------------------------------------------------------------------------------------------|
| <i>EFNA1</i>     | <i>EFNA1</i> encodes a member of the ephrin (EPH) family. Diseases associated with <i>EFNA1</i> include arteriovenous malformation. Previous GWAS studies have found variants in <i>EFNA1</i> are associated with liver enzyme levels, prostate cancer, and obesity related traits.                                                                                                                               |
| <i>MCM6</i>      | <i>MCM6</i> encodes one of the highly conserved mini-chromosome maintenance proteins (MCM) that are essential for the initiation of eukaryotic genome replication. Previous studies have found variants in <i>MCM6</i> are associated with lactate intolerant in early adulthood.                                                                                                                                 |
| <i>SI</i>        | <i>SI</i> encodes a sucrose-isomaltase enzyme that is expressed in the intestinal brush border. Mutations in this gene are the cause of congenital sucrose-isomaltase deficiency.                                                                                                                                                                                                                                 |
| <i>SLC50A1</i>   | <i>SLC50A1</i> is a protein coding gene. GO annotations related to this gene include glucoside transmembrane transporter activity.                                                                                                                                                                                                                                                                                |
| <i>MGAM</i>      | <i>MGAM</i> encodes maltase-glucoamylase that plays a role in the final steps of digestion of starch. Previous GWAS studies found variants in this gene are associated with blood metabolite levels, bitter taste response/reception, and anorexia nervosa.                                                                                                                                                       |
| <i>MGAM2</i>     | <i>MGAM2</i> is an important paralog of <i>MGAM</i> . It has been associated with carbohydrate binding and glucan 1,4-alpha-glucosidase activity.                                                                                                                                                                                                                                                                 |
| <i>SLC5A1</i>    | <i>SLC5A1</i> encodes a integral membrane protein that is the primary mediator of dietary glucose and galactose uptake from the intestinal lumen. Mutations in this gene have been associated with glucose-galactose malabsorption.                                                                                                                                                                               |
| <i>SLC5A10</i>   | This gene is a member of the sodium/glucose transporter family. The protein encoded by this gene has the highest affinity for mannose and has been reported to be most highly expressed in the kidney. This protein may function as a kidney-specific, sodium-dependent mannose and fructose co-transporter. Alternative splicing results in multiple transcript variants that encode different protein isoforms. |
| <i>LCT</i>       | <i>LCT</i> encodes glycosyl hydrolase 1 family of proteins. Mutations in this gene are associated with congenital lactase deficiency. Polymorphisms in this gene are associated with lactase persistence.                                                                                                                                                                                                         |

**Table S2. Association between 1,5-AG concentrations and the index SNPs identified in the European ancestry participants stratified by fasting glucose status.**

|             |     |           |       | Fasting glucose<126 mg/dl<br>(N=7133) |      |                        | Fasting glucose≥126<br>mg/dl<br>(N=417) |      |          | P-<br>difference<br>between<br>strata |
|-------------|-----|-----------|-------|---------------------------------------|------|------------------------|-----------------------------------------|------|----------|---------------------------------------|
| Variant ID  | Chr | Position  | A1/A2 | Effect,<br>ug/mL                      | SE   | <i>P</i>               | Effect,<br>ug/mL                        | SE   | <i>P</i> |                                       |
| rs9330264   | 1   | 155095750 | T/C   | 0.65                                  | 0.10 | 6.83x10 <sup>-11</sup> | 0.08                                    | 0.59 | 0.89     | 0.25                                  |
| rs182549    | 2   | 136616754 | T/C   | -1.20                                 | 0.10 | 7.39x10 <sup>-33</sup> | -0.98                                   | 0.60 | 0.11     | 0.37                                  |
| rs9825346   | 3   | 164807679 | G/A   | -0.62                                 | 0.09 | 2.99x10 <sup>-11</sup> | 0.21                                    | 0.55 | 0.71     | 0.13                                  |
| rs11976181  | 7   | 141797564 | T/C   | 1.13                                  | 0.12 | 7.03x10 <sup>-20</sup> | 1.02                                    | 0.70 | 0.15     | 0.39                                  |
| rs13229622  | 7   | 141844510 | C/G   | -0.65                                 | 0.11 | 1.10x10 <sup>-8</sup>  | -1.04                                   | 0.60 | 0.08     | 0.32                                  |
| rs117355297 | 17  | 18923681  | T/C   | -2.22                                 | 0.26 | 1.78x10 <sup>-17</sup> | -0.97                                   | 1.56 | 0.53     | 0.29                                  |
| rs117086479 | 22  | 32389342  | G/A   | -1.12                                 | 0.20 | 1.75x10 <sup>-8</sup>  | -0.58                                   | 1.08 | 0.59     | 0.35                                  |

A1 is the effect allele, i.e. the allele for which effect estimates are provided.

Abbreviations: Chr = chromosome; SE = standard error.

**Table S3. Association of 1,5-AG-associated SNPs with HbA1c in published GWAS data from the MAGIC consortium**

| Index SNP            |                         |       | Discovery |                    |                        |              | HbA1c <sup>a</sup>                                    |                                                 |                  |          |
|----------------------|-------------------------|-------|-----------|--------------------|------------------------|--------------|-------------------------------------------------------|-------------------------------------------------|------------------|----------|
| Locus <sup>b</sup>   | Variant ID              | A1/A2 | AF        | Effect (SE), ug/mL | <i>P</i>               | Expl Var (%) | Proxy SNP                                             | R <sup>2</sup> with index SNP <sup>c</sup> (D') | Effect (SE), %   | <i>P</i> |
| <i>EFNA1/SLC50A1</i> | rs9330264               | T/C   | 0.36      | 0.64 (0.10)        | 2.96x10 <sup>-10</sup> | 0.51         | rs11264319                                            | 0.53 (0.96)                                     | -0.0059 (0.0034) | 0.08     |
| <i>MCM6/LCT</i>      | rs182549                | C/T   | 0.33      | -1.19 (0.10)       | 6.54x10 <sup>-32</sup> | 1.91         | rs4988235                                             | 1 (1)                                           | 0.0037 (0.0037)  | 0.31     |
| <i>SI</i>            | rs9825346               | G/A   | 0.41      | -0.54 (0.10)       | 1.28x10 <sup>-8</sup>  | 0.42         | rs9825346                                             | 1                                               | 0.0016 (0.0035)  | 0.64     |
| <i>MGAM/MGAM2</i>    | rs11976181              | T/C   | 0.17      | 1.11 (0.12)        | 2.62x10 <sup>-19</sup> | 1.03         | rs3800993                                             | 1 (1)                                           | 0.0087 (0.0048)  | 0.07     |
| <i>MGAM2</i>         | rs13229622 <sup>d</sup> | C/G   | 0.22      | -0.73 (0.11)       | 8.64x10 <sup>-11</sup> | 0.54         | Not investigated due to lack of conditional estimates |                                                 |                  |          |
| <i>SLC5A10</i>       | rs117355297             | T/C   | 0.04      | -2.13 (0.26)       | 3.83x10 <sup>-16</sup> | 0.39         | rs1621499                                             | 0.28 (0.97)                                     | 0.0044 (0.0054)  | 0.42     |
| <i>SLC5A1</i>        | rs117086479             | G/A   | 0.06      | -1.09 (0.20)       | 4.05x10 <sup>-8</sup>  | 0.87         | rs4821013                                             | 1(1)                                            | -0.0017 (0.0068) | 0.80     |

<sup>a</sup> The association result with fasting glucose was extracted from the published MAGIC Consortium GWAS result<sup>1</sup>.

<sup>b</sup> The gene closest to the variant and other candidate genes are listed (index gene).

<sup>c</sup> R<sup>2</sup> information was calculated from the 1000 Genomes Project Phase 3 in European (EUR) population.

<sup>d</sup> rs13229622 is an independent SNP with genome-wide significant association with 1,5-AG found through conditional analysis.

A1 is the effect allele, i.e. the allele for which effect estimates are provided. Abbreviations: Chr = chromosome; AF = effect allele frequency; SE = standard error; SNV = single nucleotide variation; Expl Var = proportion of 1,5-AG variance explained

**Table S4. The association with 1,5-AG for 26 known fasting glucose-associated SNPs and 13 known hemoglobin A1c-associated SNPs in the EA ARIC participants without diagnosed diabetes.**

| SNPs       | Trait | Reported Gene            | Chr:position | A1/A2 | AF   | Effect, ug/mL | SE   | P    |
|------------|-------|--------------------------|--------------|-------|------|---------------|------|------|
| rs340874   | FG    | <i>PROX1</i>             | 1:214159256  | T/C   | 0.45 | -0.061        | 0.09 | 0.52 |
| rs1371614  | FG    | <i>DPYSL5</i>            | 2:27152874   | T/C   | 0.25 | -0.011        | 0.11 | 0.92 |
| rs780094   | FG    | <i>GCKR</i>              | 2:27741237   | T/C   | 0.40 | -0.061        | 0.09 | 0.52 |
| rs3736594  | FG    | <i>MRPL33</i>            | 2:27995781   | A/C   | 0.26 | -0.013        | 0.11 | 0.90 |
| rs11708067 | FG    | <i>ADCY5</i>             | 3:123065778  | G/A   | 0.23 | 0.056         | 0.11 | 0.62 |
| rs11920090 | FG    | <i>SLC2A2</i>            | 3:170717521  | A/T   | 0.13 | -0.005        | 0.14 | 0.97 |
| rs13179048 | FG    | <i>PCSK1</i>             | 5:95542726   | A/C   | 0.31 | -0.007        | 0.10 | 0.95 |
| rs2191349  | FG    | <i>TMEM195,<br/>DGKB</i> | 7:15064309   | G/T   | 0.47 | 0.019         | 0.09 | 0.84 |
| rs4607517  | FG    | <i>GCK</i>               | 7:44235668   | A/G   | 0.17 | -0.052        | 0.13 | 0.68 |
| rs4841132  | FG    | <i>PPP1R3B</i>           | 8:9183596    | A/G   | 0.09 | 0.289         | 0.17 | 0.08 |
| rs2722425  | FG    | <i>ZMAT4</i>             | 8:40484239   | T/C   | 0.12 | -0.094        | 0.14 | 0.51 |
| rs11558471 | FG    | <i>SLC30A8</i>           | 8:118185733  | G/A   | 0.32 | 0.055         | 0.10 | 0.59 |
| rs7034200  | FG    | <i>GLIS3</i>             | 9:4289050    | A/C   | 0.49 | 0.061         | 0.09 | 0.51 |
| rs10885122 | FG    | <i>ADRA2A</i>            | 10:113042093 | T/G   | 0.12 | 0.157         | 0.14 | 0.27 |
| rs4506565  | FG    | <i>TCF7L2</i>            | 10:114756041 | T/A   | 0.31 | -0.252        | 0.10 | 0.01 |
| rs11605924 | FG    | <i>CRY2</i>              | 11:45873091  | A/C   | 0.47 | -0.037        | 0.09 | 0.69 |
| rs7944584  | FG    | <i>MADD</i>              | 11:47336320  | T/A   | 0.27 | -0.146        | 0.11 | 0.17 |
| rs1483121  | FG    | <i>OR4SI</i>             | 11:48333360  | A/G   | 0.13 | -0.168        | 0.16 | 0.29 |
| rs174550   | FG    | <i>FADS1</i>             | 11:61571478  | C/T   | 0.34 | -0.022        | 0.10 | 0.82 |
| rs11603334 | FG    | <i>ARAP1</i>             | 11:72432985  | A/G   | 0.16 | 0.102         | 0.13 | 0.42 |
| rs10830963 | FG    | <i>MTNR1B</i>            | 11:92708710  | G/C   | 0.28 | -0.034        | 0.11 | 0.75 |
| rs35767    | FG    | <i>IGF1</i>              | 12:102875569 | A/G   | 0.15 | -0.129        | 0.13 | 0.33 |
| rs2293941  | FG    | <i>PDX1</i>              | 13:28491198  | A/G   | 0.22 | -0.219        | 0.11 | 0.05 |
| rs11071657 | FG    | <i>C2CD4B</i>            | 15:62433962  | G/A   | 0.38 | 0.001         | 0.10 | 0.99 |

|            |              |                            |              |     |      |        |      |      |
|------------|--------------|----------------------------|--------------|-----|------|--------|------|------|
| rs6048205  | FG           | <i>FOXA2</i>               | 20:22559601  | G/A | 0.05 | 0.248  | 0.22 | 0.25 |
| rs2779116  | HbA1c        | <i>SPTA1</i>               | 1:158585415  | T/C | 0.26 | -0.109 | 0.10 | 0.30 |
| rs1402837  | HbA1c        | <i>G6PC2</i>               | 2:169757354  | T/C | 0.22 | -0.065 | 0.11 | 0.56 |
| rs1800562  | HbA1c        | <i>HFE</i>                 | 6:26093141   | A/G | 0.06 | 0.224  | 0.19 | 0.25 |
| rs730497   | HbA1c        | <i>GCK</i>                 | 7:44223721   | A/G | 0.17 | -0.052 | 0.13 | 0.68 |
| rs6474359  | HbA1c        | <i>ANK1</i>                | 8:41549194   | C/T | 0.03 | 0.041  | 0.28 | 0.88 |
| rs4737009  | HbA1c        | <i>ANK1</i>                | 8:41630405   | A/G | 0.24 | 0.167  | 0.11 | 0.12 |
| rs16926246 | HbA1c        | <i>HK1</i>                 | 10:71093392  | T/C | 0.12 | -0.047 | 0.15 | 0.75 |
| rs7072268  | HbA1c        | <i>HK1</i>                 | 10:71099913  | T/C | 0.49 | -0.139 | 0.09 | 0.14 |
| rs1387153  | HbA1c        | <i>MTNR1B</i>              | 11:92673828  | T/C | 0.29 | -0.051 | 0.11 | 0.63 |
| rs7998202  | HbA1c        | <i>ATP11A,<br/>TUBGCP3</i> | 13:113331868 | G/A | 0.12 | -0.249 | 0.15 | 0.10 |
| rs1046896  | HbA1c        | <i>FN3K</i>                | 17:80685533  | T/C | 0.31 | 0.079  | 0.10 | 0.43 |
| rs855791   | HbA1c        | <i>TMPRSS6</i>             | 22:37462936  | A/G | 0.43 | 0.003  | 0.10 | 0.97 |
| rs560887   | HbA1c,<br>FG | <i>G6PC2</i>               | 2:169763148  | T/C | 0.30 | -0.064 | 0.10 | 0.53 |

A1 is the effect allele, i.e. the allele for which effect estimates are provided.

Abbreviations: FG = fasting glucose; Chr = chromosome; AF = effect allele frequency; SE = standard error.

## References

- 1 Soranzo, N. *et al.* Common variants at 10 genomic loci influence hemoglobin A(1)(C) levels via glyceimic and nonglyceimic pathways. *Diabetes* **59**, 3229-3239, doi:10.2337/db10-0502 (2010).
